# Supplementary material for: Blood Plasma-Derived Anti-Glycan Antibodies to Sialylated and Sulfated Glycans Identify Ovarian Cancer Patients
Source: PubMed Central journal article supplement (PMC5072665; doi:10.1371/journal.pone.0164230), 2016-10-20
Supplement: pone.0164230.s001.pdf [file pone.0164230.s001.pdf]

## S1 Appendix

### Feature selection and ranking for univariate method, glmnet and random forest

| Univariate*                | Glmnet**                    | Random forest***           | Rank |
|----------------------------|-----------------------------|----------------------------|------|
| CA125                      | CA125                       | CA125                      | 1    |
| anti-SiaT <sub>n</sub> IgM | anti-SiaT <sub>n</sub> IgM  | anti-SiaT <sub>n</sub> IgM | 2    |
| anti-O-Sulfo-TF IgM        | anti-O-Sulfo-TF IgM         | anti-O-Sulfo-TF IgM        | 3    |
| anti-6-OSulfo-LN IgG       | anti-6-OSulfo-LN IgG        | SiaLex.IgM                 | 4    |
|                            | anti-SiaLe <sup>a</sup> IgG | SiaTn.Gc..IgG              | 5    |
|                            | anti-GM <sub>2</sub> IgG    | GM2.IgG                    | 6    |
|                            |                             | GM1a.IgM                   | 7    |

\* based on significance,  $p < 0.05$

\*\* based on elastic-net feature selection

\*\*\* based on random forest variable importance, only the seven best are presented.
