# Supplementary material for: Blood Plasma-Derived Anti-Glycan Antibodies to Sialylated and Sulfated Glycans Identify Ovarian Cancer Patients
Source: PubMed Central journal article supplement (PMC5072665; doi:10.1371/journal.pone.0164230), 2016-10-20
Supplement: pone.0164230.s002.pdf [file pone.0164230.s002.pdf]

## S2 Appendix

### AUC values based on 5-fold cross-validations for "glmnet"

- 1) 5\*100 cross-validations were done, a descriptive statistics of these results are presented.
- 2) 2-4<sup>th</sup> comparisons means given biomarkers + CA125.

#### AUC

|           | Min.   | 1st Qu. | Median | Mean   | 3rd Qu. | Max. | NA's |
|-----------|--------|---------|--------|--------|---------|------|------|
| CA125     | 0.4167 | 0.8000  | 0.8964 | 0.8708 | 0.9583  | 1    | 0    |
| SiaTn     | 0.6250 | 0.9167  | 0.9667 | 0.9518 | 1.0000  | 1    | 0    |
| 6.O.Su.TF | 0.5833 | 0.8750  | 0.9583 | 0.9251 | 1.0000  | 1    | 0    |
| both      | 0.6667 | 0.9405  | 1.0000 | 0.9618 | 1.0000  | 1    | 0    |

#### Comparisons all against all

*P*-value adjustment: bonferroni

Upper diagonal: estimates of the difference

Lower diagonal: *p*-value for H0: difference = 0

#### ROC

|           |           |           |           |           |
|-----------|-----------|-----------|-----------|-----------|
|           | CA125     | SiaTn     | 6.O.Su.TF | both      |
| CA125     |           | -0.081067 | -0.054326 | -0.091019 |
| SiaTn     | < 2.2e-16 |           | 0.026740  | -0.009952 |
| 6.O.Su.TF | < 2.2e-16 | 4.397e-09 |           | -0.036693 |
| both      | < 2.2e-16 | 0.03235   | 2.138e-15 |           |
