# Supplementary material for: Blood Plasma-Derived Anti-Glycan Antibodies to Sialylated and Sulfated Glycans Identify Ovarian Cancer Patients
Source: PubMed Central journal article supplement (PMC5072665; doi:10.1371/journal.pone.0164230), 2016-10-20
Supplement: pone.0164230.s003.pdf [file pone.0164230.s003.pdf]

### S3 Appendix

#### Spearman correlation with corresponding $p$ -values:

Correlation:

|               | CA125 | SiaTn.IgM | 6.O.Su.TF.IgM |
|---------------|-------|-----------|---------------|
| CA125         | 1.00  | -0.13     | -0.06         |
| SiaTn.IgM     | -0.13 | 1.00      | 0.46          |
| 6.O.Su.TF.IgM | -0.06 | 0.46      | 1.00          |

$P$ -values:

|               | CA125  | SiaTn.IgM | 6.O.Su.TF.IgM |
|---------------|--------|-----------|---------------|
| CA125         |        | 0.3510    | 0.6597        |
| SiaTn.IgM     | 0.3510 |           | 0.0005        |
| 6.O.Su.TF.IgM | 0.6597 | 0.0005    |               |
