# Supplementary material for: Blood Plasma-Derived Anti-Glycan Antibodies to Sialylated and Sulfated Glycans Identify Ovarian Cancer Patients
Source: PubMed Central journal article supplement (PMC5072665; doi:10.1371/journal.pone.0164230), 2016-10-20

**A**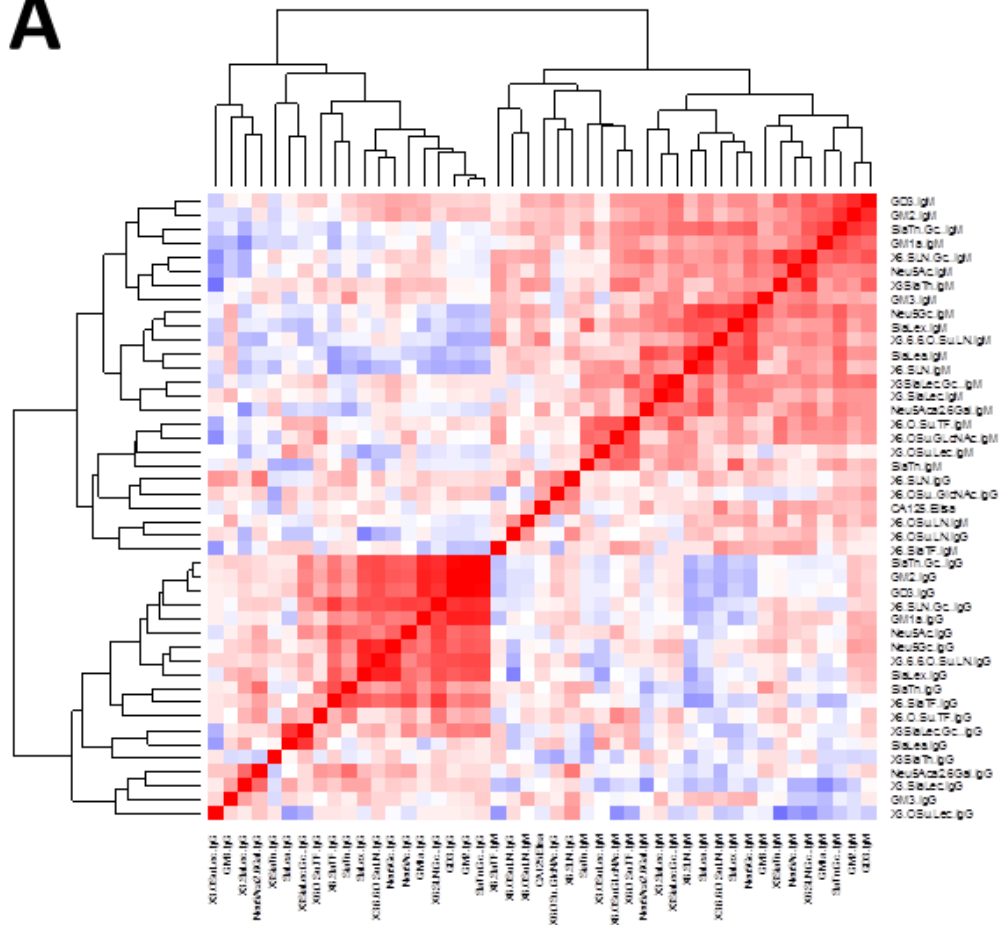**B**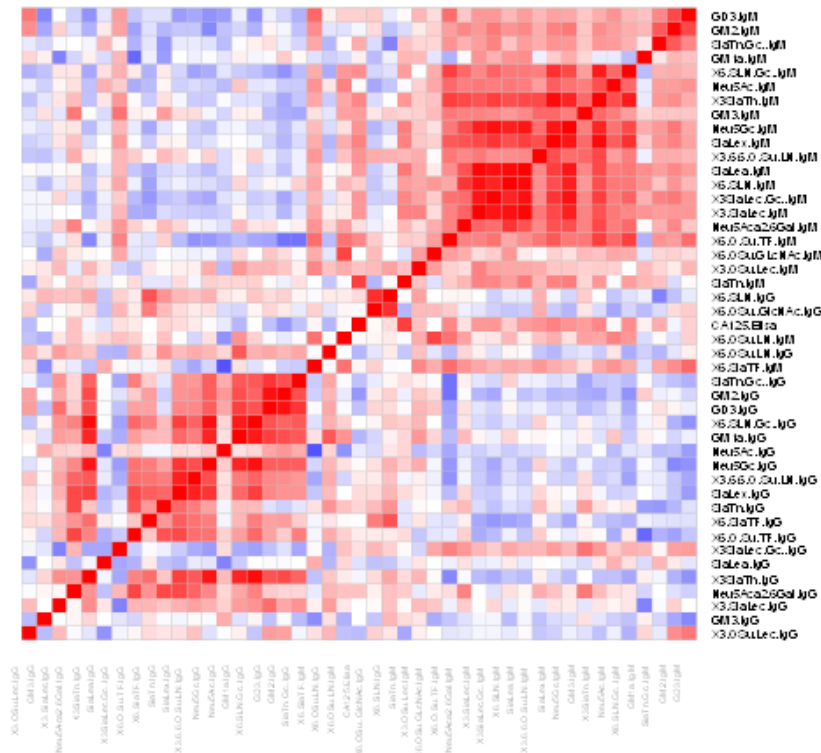

Supplement: pone.0164230.s005.pdf [file pone.0164230.s005.pdf]
