# Supplementary material for: Blood Plasma-Derived Anti-Glycan Antibodies to Sialylated and Sulfated Glycans Identify Ovarian Cancer Patients
Source: PubMed Central journal article supplement (PMC5072665; doi:10.1371/journal.pone.0164230), 2016-10-20
Supplement: pone.0164230.s006.pdf [file pone.0164230.s006.pdf]

| Set 1                 | Set 2                    | Set 3                     |
|-----------------------|--------------------------|---------------------------|
| Neu5Gc                | Neu5Ac                   | SiaLe <sup>x</sup>        |
| 3'SiaLe <sup>c</sup>  | SiaLe <sup>a</sup>       | SiaT <sub>n</sub> (Gc)    |
| SiaT <sub>n</sub>     | Neu5Aca2-6Galβ           | 3'-OSulfo-Le <sup>c</sup> |
| 3'SL, GM <sub>3</sub> | 3SiaLe <sup>c</sup> (Gc) | 6-OSulfo-LacNAc           |
| 6-SLN(Gc)             | 6-SiaTF                  | 6-O-Sulfo-TF              |
| GD <sub>3</sub>       | 6'SLN                    | GM <sub>1a</sub>          |
| 6-OSulfo-GlcNAc       | GM <sub>2</sub>          |                           |
| 3,6,6'-OSulfo3-LacNAc | 3-SiaT <sub>n</sub>      |                           |
