# Supplementary material for: Blood Plasma-Derived Anti-Glycan Antibodies to Sialylated and Sulfated Glycans Identify Ovarian Cancer Patients
Source: PubMed Central journal article supplement (PMC5072665; doi:10.1371/journal.pone.0164230), 2016-10-20
Supplement: pone.0164230.s007.pdf [file pone.0164230.s007.pdf]

| Glycan                                                                               | Short name                 | Schematic structure                                                                   | P value      |              |
|--------------------------------------------------------------------------------------|----------------------------|---------------------------------------------------------------------------------------|--------------|--------------|
|                                                                                      |                            |                                                                                       | IgM          | IgG          |
| <b>Monosaccharides</b>                                                               |                            |                                                                                       |              |              |
| Neu5Gc $\alpha$ -                                                                    | Neu5Gc                     |    | >0.1         | >0.1         |
| Neu5Ac $\alpha$ -                                                                    | Neu5Ac                     |    | >0.1         | >0.1         |
| 6-O-Su-GlcNAc $\beta$ -                                                              | 6-O-Sulfo-GlcNAc           |    | >0.1         | >0.1         |
| <b>Disaccharides</b>                                                                 |                            |                                                                                       |              |              |
| Neu5Ac $\alpha$ 2-6GalNAc $\alpha$ -                                                 | SiaT <sub>n</sub>          |    | <b>0.001</b> | >0.1         |
| Neu5Ac $\alpha$ 2-3GalNAc $\alpha$ -                                                 | 3-SiaT <sub>n</sub>        |    | >0.1         | >0.1         |
| Neu5Gc $\alpha$ 2-6GalNAc $\alpha$ -                                                 | SiaT <sub>n</sub> (Gc)     |    | >0.1         | <b>0.011</b> |
| Gal $\beta$ 1-3(Su-6)GalNAc $\alpha$ -                                               | 6-O-Sulfo-TF               |    | <b>0.005</b> | >0.1         |
| Gal $\beta$ 1-4(Su-6)GlcNAc $\beta$ -                                                | 6-O-Sulfo-LN               |    | >0.1         | 0.064        |
| Su-6Gal $\beta$ 1-4(Su2-3,6)GlcNAc $\beta$ -                                         | 3,6,6'-O-Sulfo-LN          |    | >0.1         | >0.1         |
| Su-3Gal $\beta$ 1-3GlcNAc $\beta$ -                                                  | 3'-O-Sulfo-Le <sup>c</sup> |    | >0.1         | >0.1         |
| Neu5Ac $\alpha$ 2-6Gal $\beta$ -                                                     |                            |  | >0.1         | >0.1         |
| <b>Trisaccharides</b>                                                                |                            |                                                                                       |              |              |
| Neu5Ac $\alpha$ 2-6Gal $\beta$ 1-4GlcNAc $\beta$ -                                   | 6'SLN                      |  | >0.1         | >0.05        |
| Neu5Gc $\alpha$ 2-6Gal $\beta$ 1-4GlcNAc $\beta$ -                                   | 6'SLN(Gc)                  |  | >0.1         | >0.1         |
| Neu5Gc $\alpha$ 2-3Gal $\beta$ 1-3GlcNAc $\beta$ -                                   | 3'SiaLe <sup>c</sup> (Gc)  |  | <b>0.026</b> | >0.1         |
| Neu5Ac $\alpha$ 2-3Gal $\beta$ 1-3GlcNAc $\beta$ -                                   | 3'SiaLe <sup>c</sup>       |  | >0.1         | >0.1         |
| Neu5Gc $\alpha$ 2-3Gal $\beta$ 1-3GlcNAc $\beta$ -                                   | 6-SiaTF                    |  | >0.1         | >0.1         |
| Neu5Ac $\alpha$ 2-3Gal $\beta$ 1-4Glc $\beta$ -                                      | 3'SL (GM <sub>3</sub> )    |  | <b>0.033</b> | >0.1         |
| <b>Tetrasaccharides</b>                                                              |                            |                                                                                       |              |              |
| GalNAc $\beta$ 1-4(NeuAc $\alpha$ 2-3)Gal $\beta$ 1-4Glc $\beta$ -                   | GM <sub>2</sub>            |  | >0.1         | <b>0.009</b> |
| NeuAc $\alpha$ 2-8NeuAc $\alpha$ 2-3Gal $\beta$ 1-4Glc $\beta$ -                     | GD <sub>3</sub>            |  | >0.1         | <b>0.021</b> |
| Neu5Ac $\alpha$ 2-3Gal $\beta$ 1-3(Fuc $\alpha$ 1-4)GlcNAc $\beta$ -                 | SiaLe <sup>a</sup>         |  | >0.1         | >0.05        |
| Neu5Ac $\alpha$ 2-3Gal $\beta$ 1-4(Fuc $\alpha$ 1-3)GlcNAc $\beta$ -                 | SiaLe <sup>x</sup>         |  | >0.05        | >0.1         |
| <b>Pentasaccharides</b>                                                              |                            |                                                                                       |              |              |
| Gal $\beta$ 1-3GalNAc $\beta$ 1-4(NeuAc $\alpha$ 2-3)Gal $\beta$ 1-4Glc $\beta$ -    | GM <sub>1a</sub>           |  | >0.1         | >0.1         |
|  |                            |                                                                                       |              |              |
